# Supplementary material for: Porous carbon hollow spheres synthesized via a modified Stöber method for capacitive deionization
Source: Royal Society of Chemistry journal article supplement (doi:10.1039/c6ra06489b), 2016-01-01
Supplement: c6ra06489b1.pdf [file c6ra06489b1.pdf]

## **Supplementary information**

### **Porous carbon hollow spheres synthesized via a modified Stöber method for capacitive deionization**

Zhi Yi Leong and Hui Ying Yang\*

Pillar of Engineering Product Development (EPD), Singapore University of Technology and Design, 8 Somapah Road, 487372, Singapore

\*E-mail: [yanghuiying@sutd.edu.sg](mailto:yanghuiying@sutd.edu.sg)

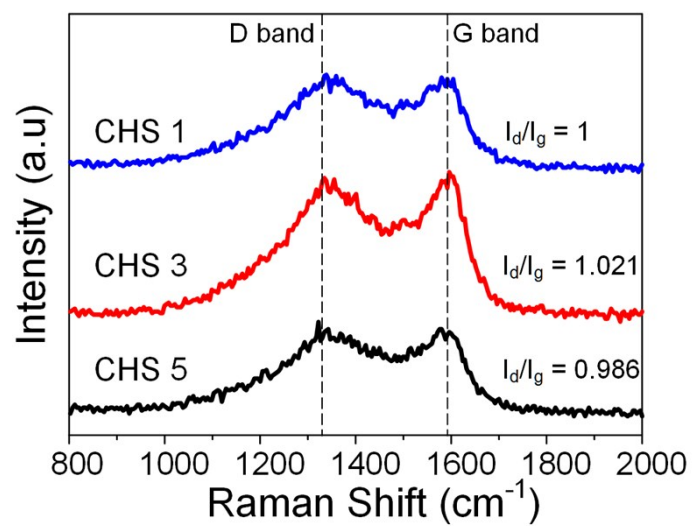

**Fig. S1** Raman spectra of CHS 1, CHS 3 and CHS 5.

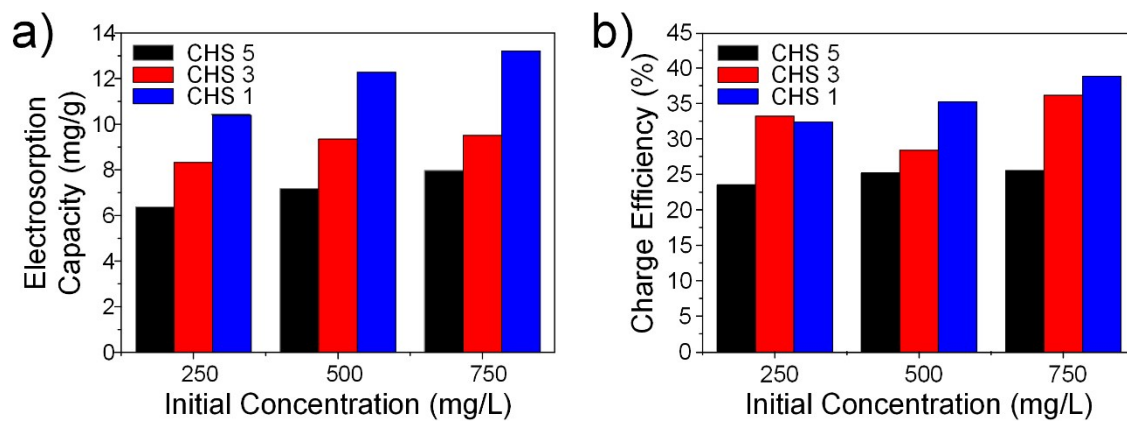

**Fig. S2** (a) Electrodesorption capacity and (b) charge efficiency of CHS 5, CHS 3, CHS 1 in 250, 500, 750 mg L<sup>-1</sup> NaCl solutions at 1.2 V.

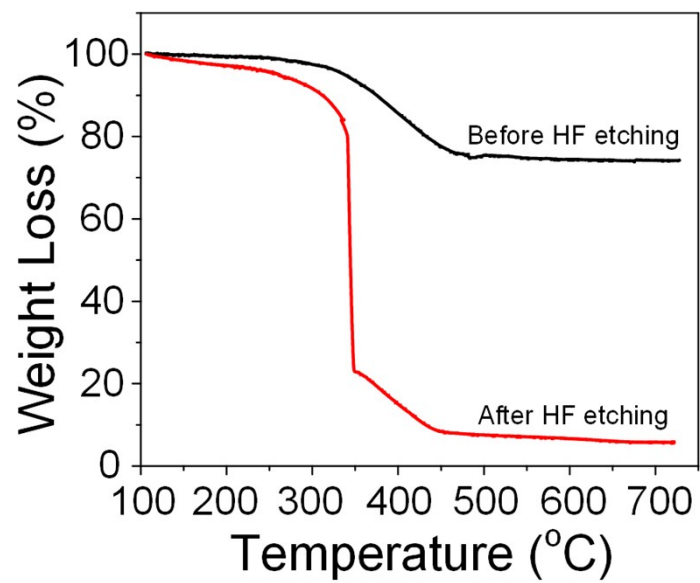

**Fig. S3** TGA of CHS 1 before and after HF etching..

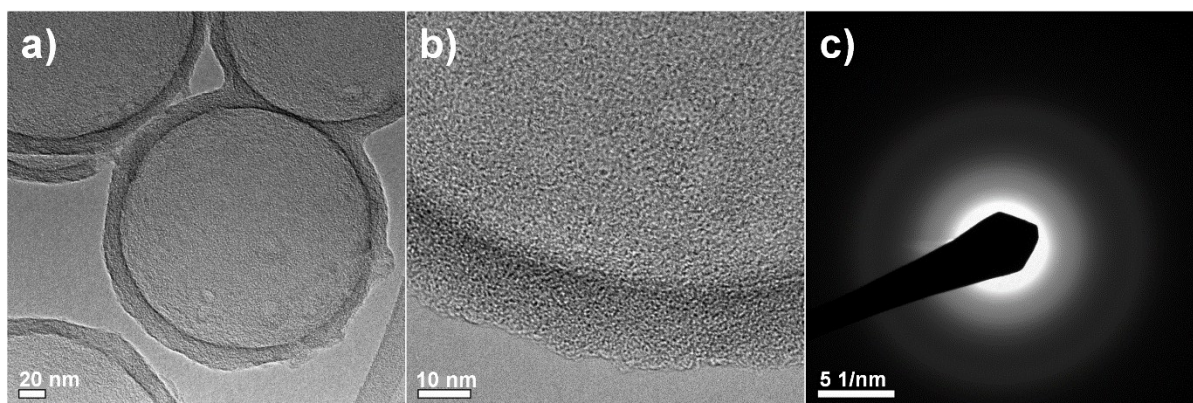

**Fig. S4** (a) and (b) HRTEM images of CHS 1. (c) SAED pattern of CHS 1.

| Sample            | Applied Voltage (V) | Initial Salt Concentration (mg L <sup>-1</sup> ) | Electrosorption Capacity (mg g <sup>-1</sup> ) | Ref.      |
|-------------------|---------------------|--------------------------------------------------|------------------------------------------------|-----------|
| CNT-RGO Composite | 1.6                 | 50                                               | 0.88                                           | 42        |
| ACC-ZnO Composite | 1.6                 | 993.5                                            | 3.6                                            | 43        |
| 3DMGA             | 1.6                 | 52.5                                             | 3.9                                            | 44        |
| NP-3DG            | 1.6                 | 500                                              | 17.1                                           | 45        |
| HPC               | 1.6                 | 26                                               | -                                              | 10        |
| CHS 1             | 1.6                 | 250                                              | 18.8                                           | This work |

**Table. S1** Comparison of electrosorption data between our work and others at 1.6 V
